# Supplementary material for: Genomic Insight Into Lacticaseibacillus paracasei SP5, Reveals Genes and Gene Clusters of Probiotic Interest and Biotechnological Potential
Source: Front Microbiol. 2022 Jun 16;13:922689. doi: 10.3389/fmicb.2022.922689 (PMC9244547; doi:10.3389/fmicb.2022.922689)
Supplement: Supplementary file 13 [file Table_3.XLSX]

## Sheet: Sheet1
	Supplementary Table 3. COG annotation of unique proteins encoded by Lc. paracasei SP5 in relation to the pangenome of isolates derived from fermented milk products.
## Mon Jan 10 12:56:55 2022 ## emapper-2.1.6 ## /data/shared/home/emapper/miniconda3/envs/eggnog-mapper-2.1/bin/emapper.py --cpu 20 --mp_start_method forkserver --data_dir /dev/shm/ -o out --output_dir /emapper_web_jobs/emapper_jobs/user_data/MM_ghtf4v58 --temp_dir /emapper_web_jobs/emapper_jobs/user_data/MM_ghtf4v58 --override -m diamond --dmnd_ignore_warnings --dmnd_algo ctg -i /emapper_web_job…
#
query	seed_ortholog	evalue	score	eggNOG_OGs	max_annot_lvl	COG_category	Description	Preferred_name	GOs	EC	KEGG_ko	KEGG_Pathway	KEGG_Module	KEGG_Reaction	KEGG_rclass	BRITE	KEGG_TC	CAZy	BiGG_Reaction	PFAMs
IEMEMHPC_00602_1	543734.LCABL_00120	4.16e-171	493.0	COG2244@1|root,COG2244@2|Bacteria,1TNYX@1239|Firmicutes,4H9RY@91061|Bacilli,3F404@33958|Lactobacillaceae	1239|Firmicutes	S	Polysaccharide biosynthesis protein	ytgP	GO:0005575,GO:0005623,GO:0005886,GO:0016020,GO:0044464,GO:0071944	-	ko:K03328,ko:K06409	-	-	-	-	ko00000,ko02000	2.A.66.2,2.A.66.2.14	-	-	Polysacc_synt,Polysacc_synt_C
IEMEMHPC_00637_1	543734.LCABL_12910	7.81e-42	137.0	2AI1X@1|root,318FN@2|Bacteria,1U7VR@1239|Firmicutes,4IHT4@91061|Bacilli,3FA8F@33958|Lactobacillaceae	1239|Firmicutes	-	-	-	-	-	-	-	-	-	-	-	-	-	-	-
IEMEMHPC_00664_1	1423816.BACQ01000027_gene954	1.77e-49	160.0	29Q9M@1|root,30B8Q@2|Bacteria,1U7QY@1239|Firmicutes,4IHN8@91061|Bacilli,3FA1A@33958|Lactobacillaceae	1239|Firmicutes	-	-	-	-	-	-	-	-	-	-	-	-	-	-	-
IEMEMHPC_00665_1	1122147.AUEH01000087_gene2438	1.66e-12	67.0	2EGZP@1|root,33ART@2|Bacteria,1VKPB@1239|Firmicutes,4HR69@91061|Bacilli	1239|Firmicutes	S	YopX protein	-	-	-	-	-	-	-	-	-	-	-	-	YopX
IEMEMHPC_00691_1	568703.LGG_01523	0.0	1076.0	COG4733@1|root,COG4926@1|root,COG4733@2|Bacteria,COG4926@2|Bacteria,1TTBV@1239|Firmicutes,4HBWT@91061|Bacilli	1239|Firmicutes	S	cellulase activity	-	-	-	-	-	-	-	-	-	-	-	-	Collagen,Prophage_tail
IEMEMHPC_00832_1	1423732.BALS01000058_gene2817	3.02e-152	430.0	COG3561@1|root,COG3561@2|Bacteria,1VGZA@1239|Firmicutes,4HVM2@91061|Bacilli	1239|Firmicutes	K	AntA/AntB antirepressor	-	-	-	ko:K07741	-	-	-	-	ko00000	-	-	-	AntA
IEMEMHPC_00834_1	1423732.BALS01000058_gene2816	8.81e-124	358.0	COG2932@1|root,COG2932@2|Bacteria,1VAT3@1239|Firmicutes,4HM0X@91061|Bacilli,3F8CM@33958|Lactobacillaceae	1239|Firmicutes	K	Peptidase S24-like	-	-	-	-	-	-	-	-	-	-	-	-	HTH_3,Peptidase_S24
IEMEMHPC_00837_1	1423748.BALB01000015_gene1416	8e-180	508.0	COG0270@1|root,COG0270@2|Bacteria,1TSNX@1239|Firmicutes,4HFAI@91061|Bacilli	1239|Firmicutes	L	Belongs to the class I-like SAM-binding methyltransferase superfamily. C5-methyltransferase family	dcm	GO:0003674,GO:0003824,GO:0006139,GO:0006259,GO:0006304,GO:0006305,GO:0006306,GO:0006725,GO:0006807,GO:0006950,GO:0006952,GO:0008150,GO:0008152,GO:0008168,GO:0009307,GO:0009987,GO:0016740,GO:0016741,GO:0032259,GO:0032776,GO:0034641,GO:0043170,GO:0043412,GO:0043414,GO:0044237,GO:0044238,GO:0044260,GO:0044355,GO:0044728,GO:0046483,GO:0050896,GO:0071704,GO:0090304,GO:0099046,GO:1901360	2.1.1.37	ko:K00558	ko00270,ko01100,ko05206,map00270,map01100,map05206	M00035	R04858	RC00003,RC00332	ko00000,ko00001,ko00002,ko01000,ko02048,ko03032,ko03036	-	-	-	DNA_methylase
IEMEMHPC_00838_1	1423748.BALB01000015_gene1415	1.07e-81	256.0	COG1479@1|root,COG1479@2|Bacteria,1V3XN@1239|Firmicutes,4HJ9V@91061|Bacilli	1239|Firmicutes	S	Protein of unknown function DUF262	-	-	-	-	-	-	-	-	-	-	-	-	DUF262
IEMEMHPC_00839_1	1221537.B807_584	4.77e-62	201.0	2F0KB@1|root,33TNZ@2|Bacteria,1VRXR@1239|Firmicutes,4HT3X@91061|Bacilli,3F6NR@33958|Lactobacillaceae	1239|Firmicutes	-	-	-	-	-	-	-	-	-	-	-	-	-	-	-
IEMEMHPC_00843_1	543734.LCABL_12650	1.04e-72	253.0	COG5492@1|root,COG5492@2|Bacteria,1U5Y9@1239|Firmicutes,4IFME@91061|Bacilli,3F6PJ@33958|Lactobacillaceae	1239|Firmicutes	N	domain, Protein	-	-	-	-	-	-	-	-	-	-	-	-	-
IEMEMHPC_01270_1	565653.EGBG_02781	8.21e-11	63.9	COG0582@1|root,COG0582@2|Bacteria,1TRCD@1239|Firmicutes,4HDUS@91061|Bacilli,4B0UA@81852|Enterococcaceae	1239|Firmicutes	L	Phage integrase family	int	-	-	-	-	-	-	-	-	-	-	-	Phage_integrase
IEMEMHPC_01601_1	1122152.AUEI01000016_gene1337	8.05e-23	96.7	COG4586@1|root,COG4586@2|Bacteria,1TP1N@1239|Firmicutes,4H9NR@91061|Bacilli,3F5QG@33958|Lactobacillaceae	1239|Firmicutes	S	ABC transporter	-	-	-	ko:K01990	-	M00254	-	-	ko00000,ko00002,ko02000	3.A.1	-	-	ABC_tran
IEMEMHPC_01997_1	543734.LCABL_07790	0.0	940.0	COG2508@1|root,COG2508@2|Bacteria,1TRRH@1239|Firmicutes,4HQKK@91061|Bacilli,3F5KD@33958|Lactobacillaceae	1239|Firmicutes	QT	PucR C-terminal helix-turn-helix domain	-	-	-	-	-	-	-	-	-	-	-	-	HTH_30
IEMEMHPC_02359_1	543734.LCABL_07750	3.08e-93	272.0	2DTIF@1|root,33KHD@2|Bacteria,1UIGW@1239|Firmicutes,4ISGW@91061|Bacilli,3F7X1@33958|Lactobacillaceae	1239|Firmicutes	S	GtrA-like protein	-	-	-	-	-	-	-	-	-	-	-	-	GtrA
IEMEMHPC_02405_1	543734.LCABL_00480	1.83e-66	202.0	COG4392@1|root,COG4392@2|Bacteria,1VH9Q@1239|Firmicutes,4HNDZ@91061|Bacilli,3F7IU@33958|Lactobacillaceae	1239|Firmicutes	S	Branched-chain amino acid transport protein (AzlD)	azlD	-	-	-	-	-	-	-	-	-	-	-	AzlD
IEMEMHPC_02651_1	1154757.Q5C_03750	8.61e-134	395.0	COG0732@1|root,COG0732@2|Bacteria,1TP5N@1239|Firmicutes,4HFAV@91061|Bacilli,4AXBM@81850|Leuconostocaceae	1239|Firmicutes	V	type I restriction modification DNA specificity domain protein	hsdS	-	3.1.21.3	ko:K01154	-	-	-	-	ko00000,ko01000,ko02048	-	-	-	Methylase_S
IEMEMHPC_02659_1	1423816.BACQ01000041_gene1627	2.7e-125	361.0	COG3711@1|root,COG3711@2|Bacteria,1TT5A@1239|Firmicutes,4HC5Y@91061|Bacilli,3F4SJ@33958|Lactobacillaceae	1239|Firmicutes	K	CAT RNA binding domain	licT	-	-	ko:K03488	-	-	-	-	ko00000,ko03000	-	-	-	CAT_RBD,PRD
IEMEMHPC_02660_1	1423816.BACQ01000041_gene1628	4.4e-47	151.0	COG1952@1|root,COG1952@2|Bacteria,1U778@1239|Firmicutes,4IH20@91061|Bacilli,3F929@33958|Lactobacillaceae	1239|Firmicutes	U	Preprotein translocase subunit SecB	-	-	-	-	-	-	-	-	-	-	-	-	SecB
IEMEMHPC_02684_1	1423732.BALS01000002_gene1059	3.23e-115	332.0	COG0582@1|root,COG0582@2|Bacteria,1TTJI@1239|Firmicutes,4HDG6@91061|Bacilli,3F6GB@33958|Lactobacillaceae	1239|Firmicutes	L	Phage integrase family	sip	-	-	-	-	-	-	-	-	-	-	-	Arm-DNA-bind_4,Phage_int_SAM_3,Phage_integrase
IEMEMHPC_02796_1	1423732.BALS01000112_gene18	7.74e-42	141.0	COG1309@1|root,COG1309@2|Bacteria,1V1DM@1239|Firmicutes,4HG0Y@91061|Bacilli,3F5CS@33958|Lactobacillaceae	1239|Firmicutes	K	Bacterial regulatory proteins, tetR family	yobS	GO:0000976,GO:0001067,GO:0003674,GO:0003676,GO:0003677,GO:0003690,GO:0003700,GO:0005488,GO:0005575,GO:0005622,GO:0005623,GO:0005737,GO:0005829,GO:0006355,GO:0008150,GO:0009889,GO:0010468,GO:0010556,GO:0019219,GO:0019222,GO:0031323,GO:0031326,GO:0043565,GO:0044212,GO:0044424,GO:0044444,GO:0044464,GO:0050789,GO:0050794,GO:0051171,GO:0051252,GO:0060255,GO:0065007,GO:0080090,GO:0097159,GO:0140110,GO:…	-	-	-	-	-	-	-	-	-	-	TetR_N,WHG
IEMEMHPC_02809_1	913848.AELK01000083_gene1710	0.0	1036.0	COG2723@1|root,COG2723@2|Bacteria,1TP19@1239|Firmicutes,4HA1W@91061|Bacilli,3F3PQ@33958|Lactobacillaceae	1239|Firmicutes	G	Belongs to the glycosyl hydrolase 1 family	-	-	3.2.1.86	ko:K01223	ko00010,ko00500,map00010,map00500	-	R00839,R05133,R05134	RC00049,RC00171,RC00714	ko00000,ko00001,ko01000	-	GT1	-	Glyco_hydro_1
IEMEMHPC_02810_1	913848.AELK01000083_gene1711	0.0	1161.0	COG1263@1|root,COG1264@1|root,COG2190@1|root,COG1263@2|Bacteria,COG1264@2|Bacteria,COG2190@2|Bacteria,1TP5X@1239|Firmicutes,4HA0I@91061|Bacilli,3F458@33958|Lactobacillaceae	1239|Firmicutes	G	phosphotransferase system	-	-	-	ko:K02755,ko:K02756,ko:K02757	ko02060,map02060	M00271	-	-	ko00000,ko00001,ko00002,ko01000,ko02000	4.A.1.2.11,4.A.1.2.2,4.A.1.2.5,4.A.1.2.6	-	-	PTS_EIIA_1,PTS_EIIB,PTS_EIIC
IEMEMHPC_02811_1	913848.AELK01000083_gene1712	3.9e-44	150.0	COG3711@1|root,COG3711@2|Bacteria,1TT5A@1239|Firmicutes,4HC5Y@91061|Bacilli,3F4SJ@33958|Lactobacillaceae	1239|Firmicutes	K	CAT RNA binding domain	licT	-	-	ko:K03488	-	-	-	-	ko00000,ko03000	-	-	-	CAT_RBD,PRD
IEMEMHPC_02817_1	543734.LCABL_29070	9.31e-56	180.0	COG0235@1|root,COG0235@2|Bacteria,1TPDV@1239|Firmicutes,4H9W0@91061|Bacilli,3F43P@33958|Lactobacillaceae	1239|Firmicutes	G	links the arabinose metabolic pathway to the pentose phosphate pathway and allows the bacteria to use arabinose as an energy source	araD	GO:0003674,GO:0003824,GO:0005488,GO:0005575,GO:0005622,GO:0005623,GO:0005737,GO:0005829,GO:0005975,GO:0005996,GO:0006793,GO:0006796,GO:0008150,GO:0008152,GO:0008270,GO:0008742,GO:0009056,GO:0009058,GO:0009987,GO:0016052,GO:0016829,GO:0016830,GO:0016832,GO:0016853,GO:0016854,GO:0016857,GO:0019321,GO:0019323,GO:0019566,GO:0019568,GO:0019569,GO:0019572,GO:0019637,GO:0043167,GO:0043169,GO:0044237,GO:…	4.1.2.17,5.1.3.4	ko:K01628,ko:K03077	ko00040,ko00051,ko00053,ko01100,ko01120,map00040,map00051,map00053,map01100,map01120	M00550	R02262,R05850	RC00603,RC00604,RC01479	ko00000,ko00001,ko00002,ko01000	-	-	iHN637.CLJU_RS00590	Aldolase_II
IEMEMHPC_02819_1	543734.LCABL_29090	2.49e-76	234.0	COG3623@1|root,COG3623@2|Bacteria,1TSMS@1239|Firmicutes,4HBBU@91061|Bacilli,3F5GZ@33958|Lactobacillaceae	1239|Firmicutes	G	Xylose isomerase-like TIM barrel	sga	-	5.1.3.22	ko:K03079	ko00040,ko00053,ko01100,ko01120,map00040,map00053,map01100,map01120	M00550	R03244	RC00540	ko00000,ko00001,ko00002,ko01000	-	-	-	AP_endonuc_2
IEMEMHPC_02827_1	543734.LCABL_00140	0.0	983.0	COG1271@1|root,COG1271@2|Bacteria,1TRH4@1239|Firmicutes,4HA19@91061|Bacilli,3F5E6@33958|Lactobacillaceae	1239|Firmicutes	C	Cytochrome bd terminal oxidase subunit I	cydA	-	1.10.3.14	ko:K00425	ko00190,ko01100,ko02020,map00190,map01100,map02020	M00153	R11325	RC00061	ko00000,ko00001,ko00002,ko01000	3.D.4.3	-	-	Cyt_bd_oxida_I
IEMEMHPC_02830_1	701521.PECL_1165	1.6e-30	118.0	COG0438@1|root,COG0438@2|Bacteria,1TPHK@1239|Firmicutes,4HAXV@91061|Bacilli,3F5EZ@33958|Lactobacillaceae	1239|Firmicutes	M	Glycosyl transferases group 1	-	-	-	-	-	-	-	-	-	-	-	-	Glycos_transf_1
IEMEMHPC_02838_1	1074451.CRL705_1879	7.13e-148	434.0	2C57J@1|root,2Z88T@2|Bacteria,1TP80@1239|Firmicutes,4HEIE@91061|Bacilli,3F6BN@33958|Lactobacillaceae	1239|Firmicutes	-	-	-	-	-	-	-	-	-	-	-	-	-	-	-
IEMEMHPC_02839_1	1074451.CRL705_1880	9.54e-137	394.0	COG0338@1|root,COG0338@2|Bacteria,1TRDX@1239|Firmicutes,4HDFS@91061|Bacilli,3F3TA@33958|Lactobacillaceae	1239|Firmicutes	H	Site-specific DNA-methyltransferase (adenine-specific)	dam	-	2.1.1.72	ko:K06223	ko03430,map03430	-	-	-	ko00000,ko00001,ko01000,ko02048,ko03032,ko03400	-	-	-	MethyltransfD12
IEMEMHPC_02840_1	1291743.LOSG293_360110	7.4e-52	168.0	COG1961@1|root,COG1961@2|Bacteria,1TQAX@1239|Firmicutes,4HCFF@91061|Bacilli,3F429@33958|Lactobacillaceae	1239|Firmicutes	L	Helix-turn-helix domain of Hin and related proteins, a family of DNA-binding domains unique to bacteria and represented by the Hin protein of Salmonella. The basic HTH domain is a simple fold comprised of three core helices that form a right-handed	res	-	-	-	-	-	-	-	-	-	-	-	HTH_7,Resolvase
IEMEMHPC_02844_1	1069534.LRC_01420	2.71e-98	300.0	COG0463@1|root,COG0463@2|Bacteria,1VVRP@1239|Firmicutes,4HVYS@91061|Bacilli,3FBY0@33958|Lactobacillaceae	1239|Firmicutes	M	Glycosyltransferase like family 2	-	-	-	-	-	-	-	-	-	-	-	-	Glycos_transf_2
IEMEMHPC_02845_1	1095738.HMPREF1047_0072	7.53e-95	291.0	COG0438@1|root,COG0438@2|Bacteria,1TPG9@1239|Firmicutes,4IEJQ@91061|Bacilli,1WQ2B@1303|Streptococcus oralis	1239|Firmicutes	H	Stealth protein CR2, conserved region 2	-	-	-	-	-	-	-	-	-	-	-	-	Stealth_CR1,Stealth_CR2,Stealth_CR3,Stealth_CR4
IEMEMHPC_02878_1	641107.CDLVIII_2108	7.14e-70	228.0	2DBKM@1|root,2Z9U2@2|Bacteria,1UETE@1239|Firmicutes,24Y0H@186801|Clostridia	1239|Firmicutes	-	-	-	-	-	-	-	-	-	-	-	-	-	-	-
IEMEMHPC_02880_1	568703.LGG_00447	5.34e-44	147.0	COG3410@1|root,COG3410@2|Bacteria,1TPQU@1239|Firmicutes,4HBI0@91061|Bacilli,3F47M@33958|Lactobacillaceae	1239|Firmicutes	N	Uncharacterized conserved protein (DUF2075)	-	-	-	ko:K09384	-	-	-	-	ko00000	-	-	-	DUF2075,GIY-YIG
IEMEMHPC_02890_1	543734.LCABL_25730	5.16e-31	113.0	COG0110@1|root,COG0110@2|Bacteria,1TQEX@1239|Firmicutes,4HAJ0@91061|Bacilli,3F59K@33958|Lactobacillaceae	1239|Firmicutes	S	Maltose acetyltransferase	-	-	2.3.1.79	ko:K00661	-	-	-	-	ko00000,ko01000	-	-	-	Hexapep,Hexapep_2,Mac
IEMEMHPC_02895_1	1536769.P40081_03815	2.05e-87	269.0	COG0702@1|root,COG0702@2|Bacteria,1V6KQ@1239|Firmicutes,4HJ7A@91061|Bacilli,26SS2@186822|Paenibacillaceae	1239|Firmicutes	GM	nucleoside-diphosphate sugar epimerase	-	-	-	-	-	-	-	-	-	-	-	-	NAD_binding_10,NmrA
IEMEMHPC_02896_1	189425.PGRAT_27345	5.07e-39	137.0	COG1695@1|root,COG1695@2|Bacteria,1TSNN@1239|Firmicutes,4HG0U@91061|Bacilli,26YMB@186822|Paenibacillaceae	1239|Firmicutes	K	Transcriptional regulator PadR-like family	-	-	-	-	-	-	-	-	-	-	-	-	PadR
IEMEMHPC_02899_1	862514.HMPREF0623_1599	3.29e-234	645.0	COG5039@1|root,COG5039@2|Bacteria,1V5MK@1239|Firmicutes,4HB4G@91061|Bacilli,3F5ZU@33958|Lactobacillaceae	1239|Firmicutes	GM	Polysaccharide pyruvyl transferase	-	-	-	ko:K19426	-	-	-	-	ko00000,ko01000	-	-	-	PS_pyruv_trans
IEMEMHPC_02900_1	862514.HMPREF0623_1598	1.85e-113	337.0	COG0477@1|root,COG2814@2|Bacteria,1TREV@1239|Firmicutes,4HAN1@91061|Bacilli,3F3ZS@33958|Lactobacillaceae	1239|Firmicutes	EGP	Belongs to the major facilitator superfamily. Sugar transporter (TC 2.A.1.1) family	-	-	-	-	-	-	-	-	-	-	-	-	Sugar_tr
IEMEMHPC_02925_1	457412.RSAG_04591	1.34e-146	422.0	COG0675@1|root,COG0675@2|Bacteria,1TT7D@1239|Firmicutes,24CRM@186801|Clostridia,3WS41@541000|Ruminococcaceae	1239|Firmicutes	L	Transposase, IS605 OrfB family	-	-	-	-	-	-	-	-	-	-	-	-	OrfB_IS605,OrfB_Zn_ribbon
IEMEMHPC_02927_1	240302.BN982_03632	8.89e-22	93.2	COG0477@1|root,COG2814@2|Bacteria,1TREV@1239|Firmicutes,4HAN1@91061|Bacilli	1239|Firmicutes	U	Belongs to the major facilitator superfamily. Sugar transporter (TC 2.A.1.1) family	araE	GO:0003674,GO:0005215,GO:0005351,GO:0005402,GO:0005575,GO:0005623,GO:0005886,GO:0006810,GO:0006811,GO:0006812,GO:0008150,GO:0008324,GO:0008643,GO:0015075,GO:0015077,GO:0015078,GO:0015144,GO:0015291,GO:0015293,GO:0015294,GO:0015295,GO:0015318,GO:0015672,GO:0016020,GO:0022804,GO:0022857,GO:0022890,GO:0034219,GO:0034220,GO:0044464,GO:0051179,GO:0051234,GO:0055085,GO:0071702,GO:0071944,GO:0098655,GO:…	-	ko:K02100	-	-	-	-	ko00000,ko02000	2.A.1.1.2	-	-	Sugar_tr
## 52 queries scanned
## Total time (seconds): 49.10043430328369
## Rate: 1.06 q/s

## Sheet: Φύλλο1
-
-
-
-
-			C- Energy production and conversion	1	2.38095
C			D- Cell cycle control and mitosis	0	0
EGP			E- Amino Acid metabolism and transport	1	2.38095
G			F- Nucleotide metabolism and transport	0	0
G			G- Carbohydrate metabolism and transport	7	16.6667
G			H- Coenzyme metabolism	2	4.7619
G			I- Lipid metabolism	0	0
GM			J- Translation	0	0
GM			K- Transcription	6	14.2857
H			L- Replication and repair	5	11.9048
H			M- Cell wall/membrane/envelope biogenesis	4	9.52381
K			N- Cell motility	2	4.7619
K			O- Post-translational modification, protein turnover, chaperone functions	0	0
K			P- Inorganic ion transport and metabolism	1	2.38095
K			Q- Secondary Structure	1	2.38095
K			T- Signal Transduction	1	2.38095
K			U- Intracellular trafficing and secretion	2	4.7619
L			V- Defence mechanisms	1	2.38095
L			S- Function Unknown	8	19.0476
L			total	42
L
L
M
M
N
N
QT
S
S
S
S
S
S
S
S
U
U
V
